# Supplementary material for: CO2 hydrogenation on ruthenium: comparative study of catalyst supports
Source: Royal Society of Chemistry journal article supplement (doi:10.1039/d4su00469h), 2024-01-01
Supplement: d4su00469h2.pdf [file d4su00469h2.pdf]

## CO<sub>2</sub> hydrogenation on Ruthenium: Comparative study of catalyst supports: Supplementary Information

Göran Baade, Jens Friedland, Koustuv Ray, and Robert Güttel

### 1. EXPERIMENTAL SETUP

The screening experiments are conducted in an automated setup, the P&ID flowsheet of which is shown in Fig.(S1).

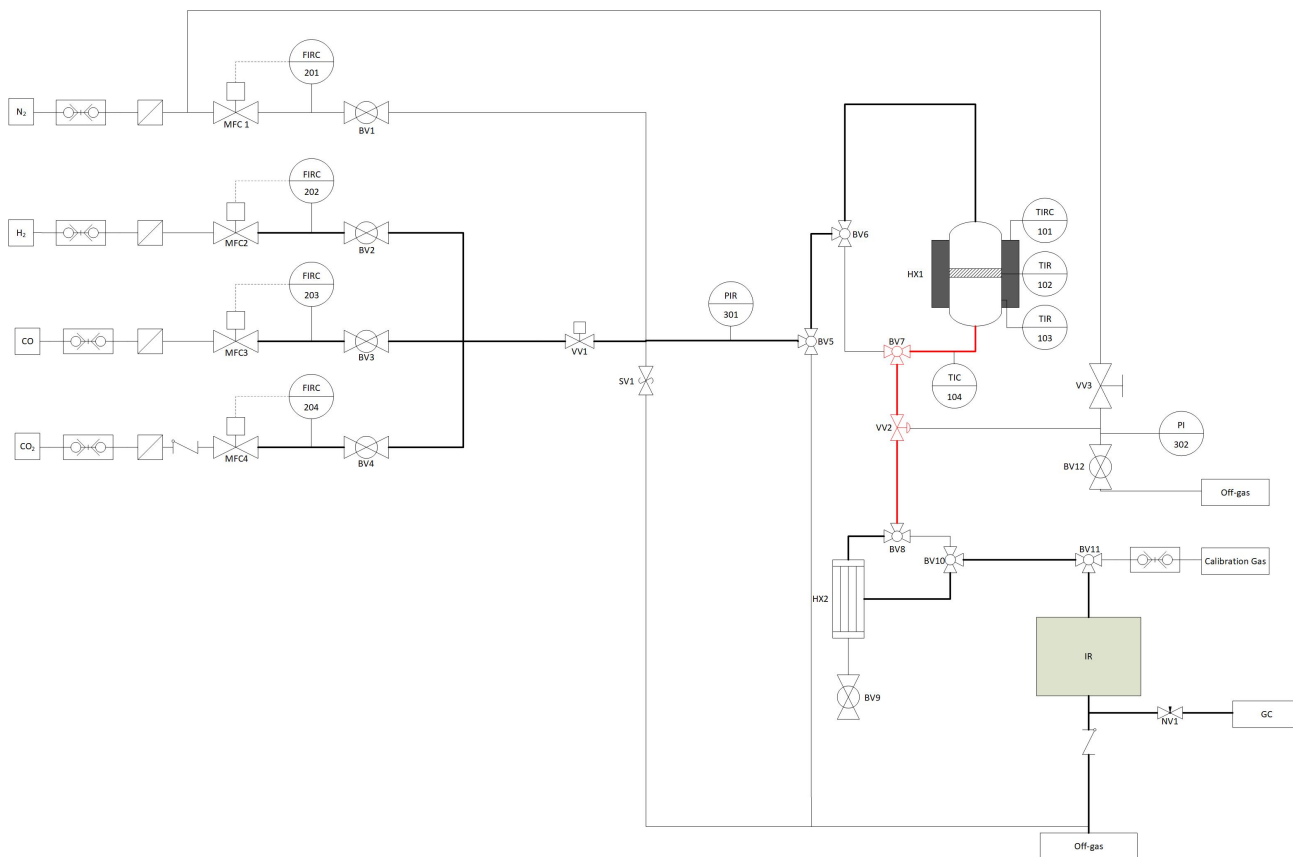

**Fig. S1.** P&ID flowsheet of the setup for screening experiments. Thicker lines indicate main process stream, red lines indicate pipes heated to 120°C.

The kinetic experiments are conducted in the same reactor in a different setup. The P&ID flowsheet for the setup in which the kinetic experiments are conducted is shown in Fig. (S2).

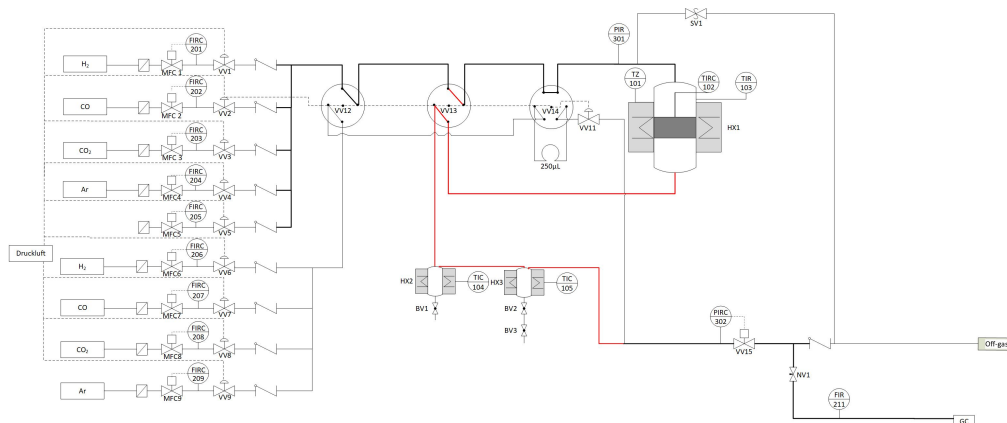

**Fig. S2.** P&ID flowsheet of plant for kinetic experiments. Thicker lines indicate main process stream, red lines indicate pipes heated to 120°C.

The reactor setup is identical in both plants. The 30 cm tubular reactor made of stainless steel is evenly heated by two aluminium half-jackets of 20 cm length with an inner diameter of 1/4 inch and an outer diameter of 6 cm. Four heating cartridges are built into the aluminium jacket, one of which is manufactured with a built-in K-type thermocouple. On the inner side of one of the half-jackets a 1 mm kerf is used to place a 1 mm K-type thermocouple at the interface between the heating jacket and the outer reactor wall. The two heating jackets are clamped together and insulated by aluminium laminated mineral wool.

The upstream end of the reactor tube consists of a T-piece. The end connected to the reactor tube and the perpendicular end are 1/4 inch iso-threads tightened with ferrules. The end axial to the reactor tube is a 1/4 inch female NPT-threading into which a straight 1/4 inch male-NPT to 1/16 inch iso-thread connector is set. The 1/16 inch iso-thread is used to lead a sealed tube through the whole length of the reactor to be able to place a K-type thermocouple in the center of the catalyst bed.

## 2. ADDITIONAL CHARACTERIZATION

### A. Physisorption Isotherms

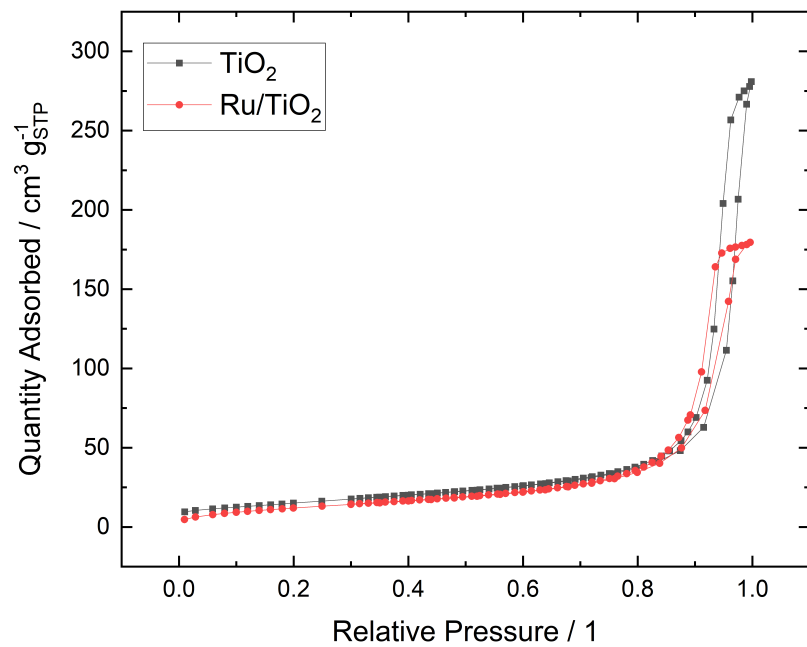

**Fig. S3.** Physisorption isotherms of fresh TiO<sub>2</sub> support and Ru/TiO<sub>2</sub> catalyst.

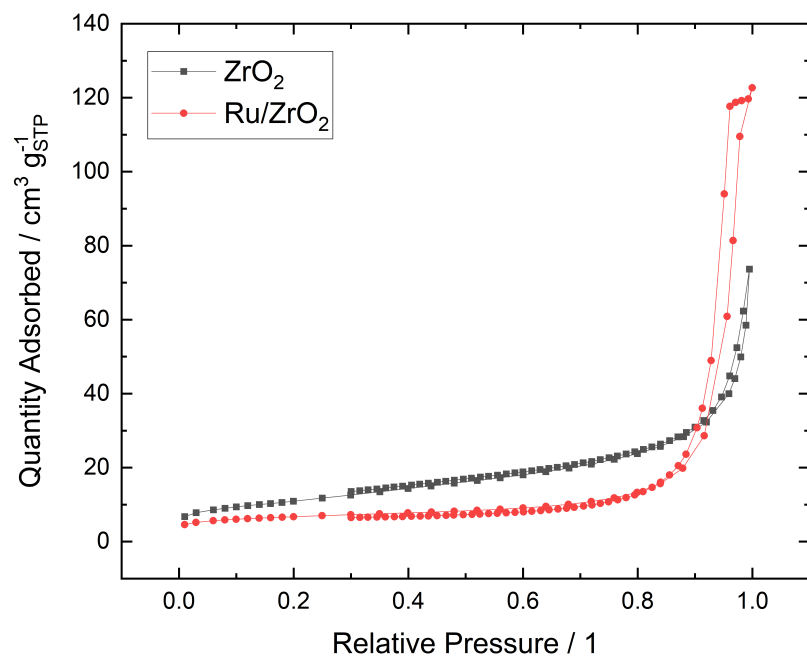

**Fig. S4.** Physisorption isotherms of fresh  $\text{ZrO}_2$  support and  $\text{Ru/ZrO}_2$  catalyst.

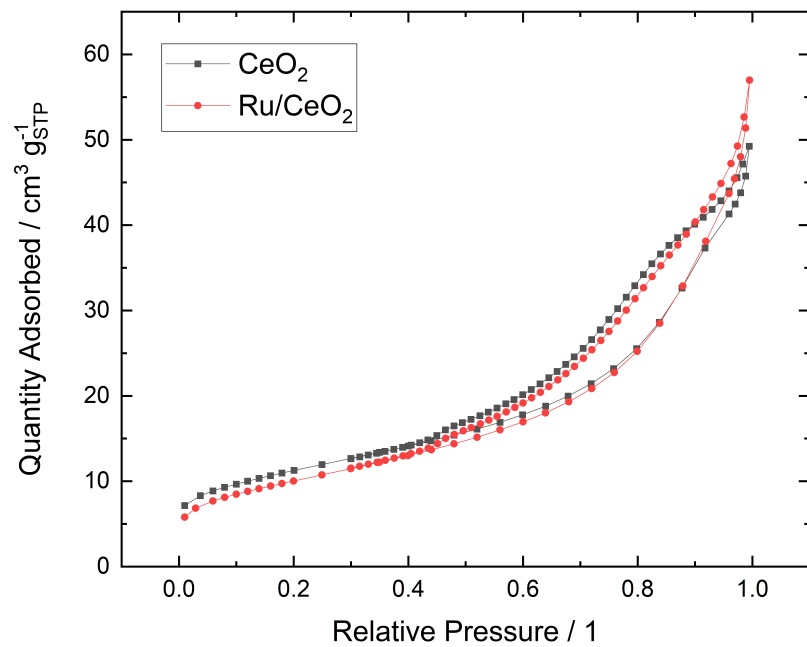

**Fig. S5.** Physisorption isotherms of fresh  $\text{CeO}_2$  support and  $\text{Ru/CeO}_2$  catalyst.

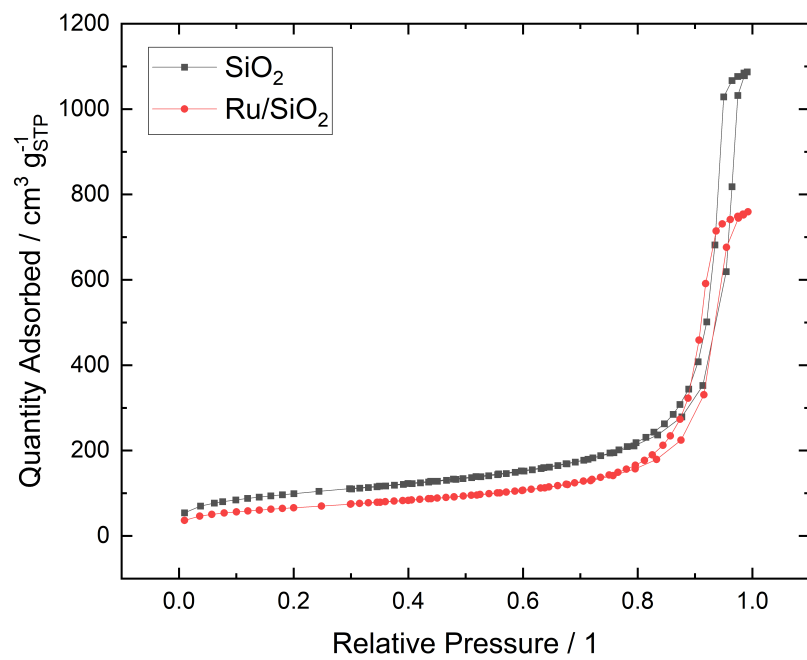

**Fig. S6.** Physisorption isotherms of fresh  $\text{SiO}_2$  support and  $\text{Ru}/\text{SiO}_2$  catalyst.

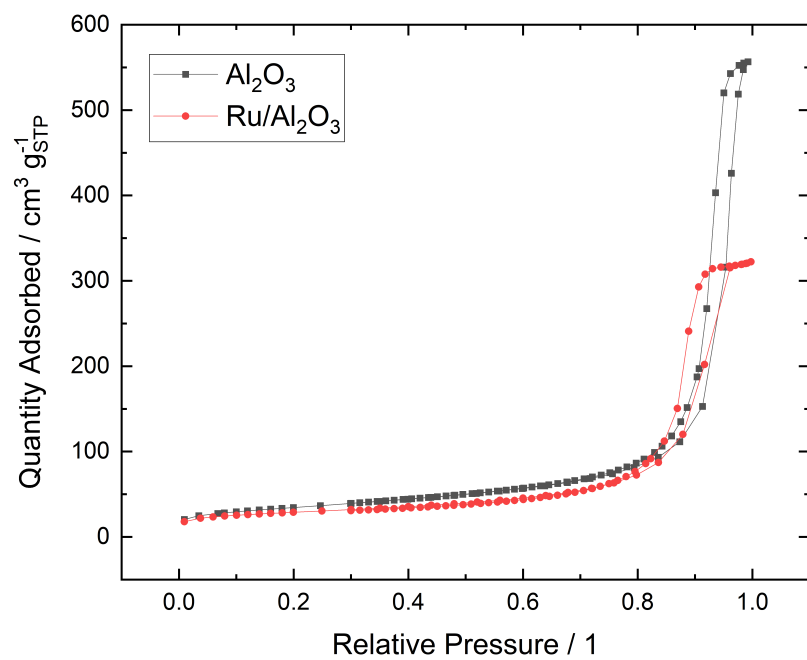

**Fig. S7.** Physisorption isotherms of fresh  $\text{Al}_2\text{O}_3$  support and  $\text{Ru}/\text{Al}_2\text{O}_3$  catalyst.

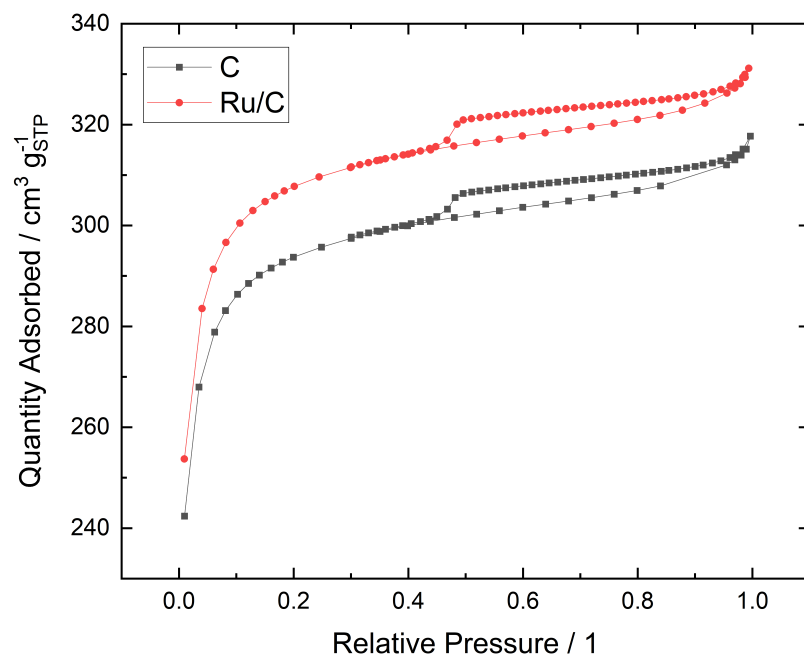

**Fig. S8.** Physorption isotherms of fresh C support and Ru/C catalyst.

## B. TEM Images

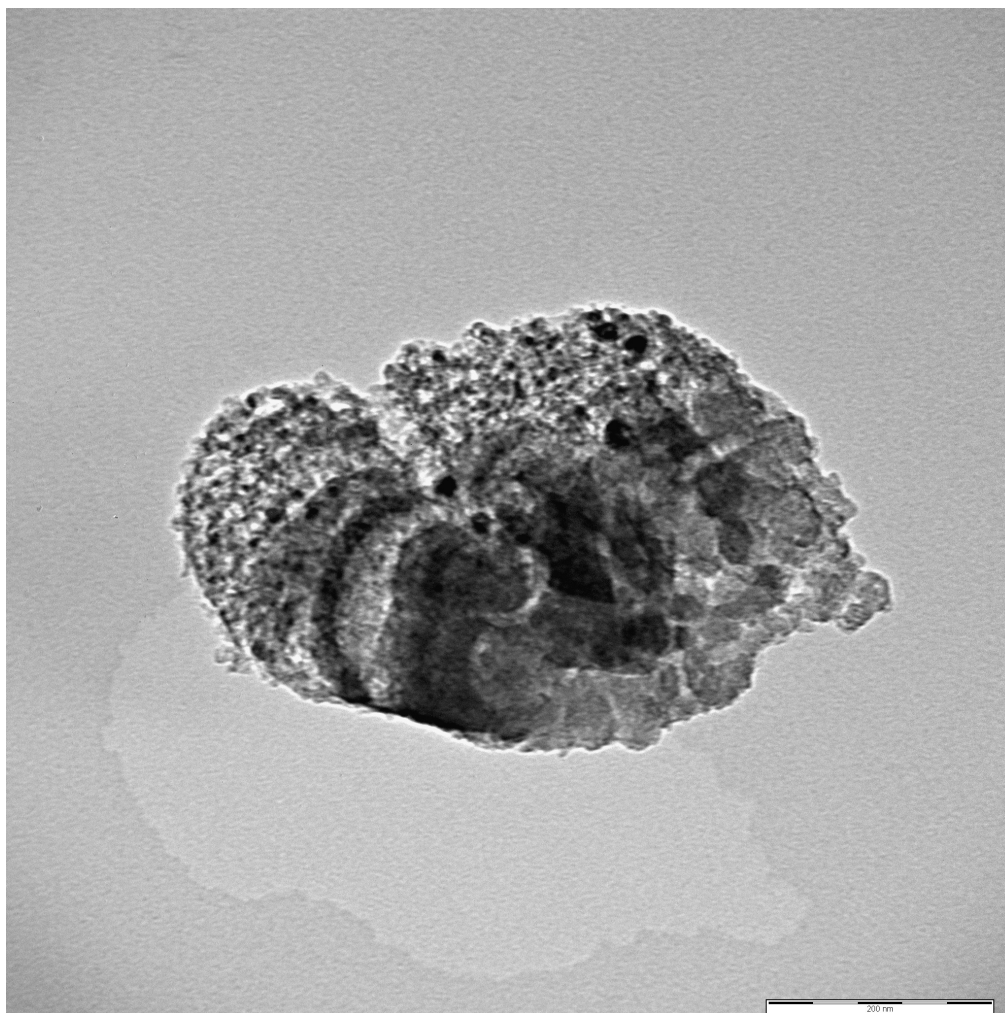

**Fig. S9.** Representative TEM image of Ru/TiO<sub>2</sub> catalyst.

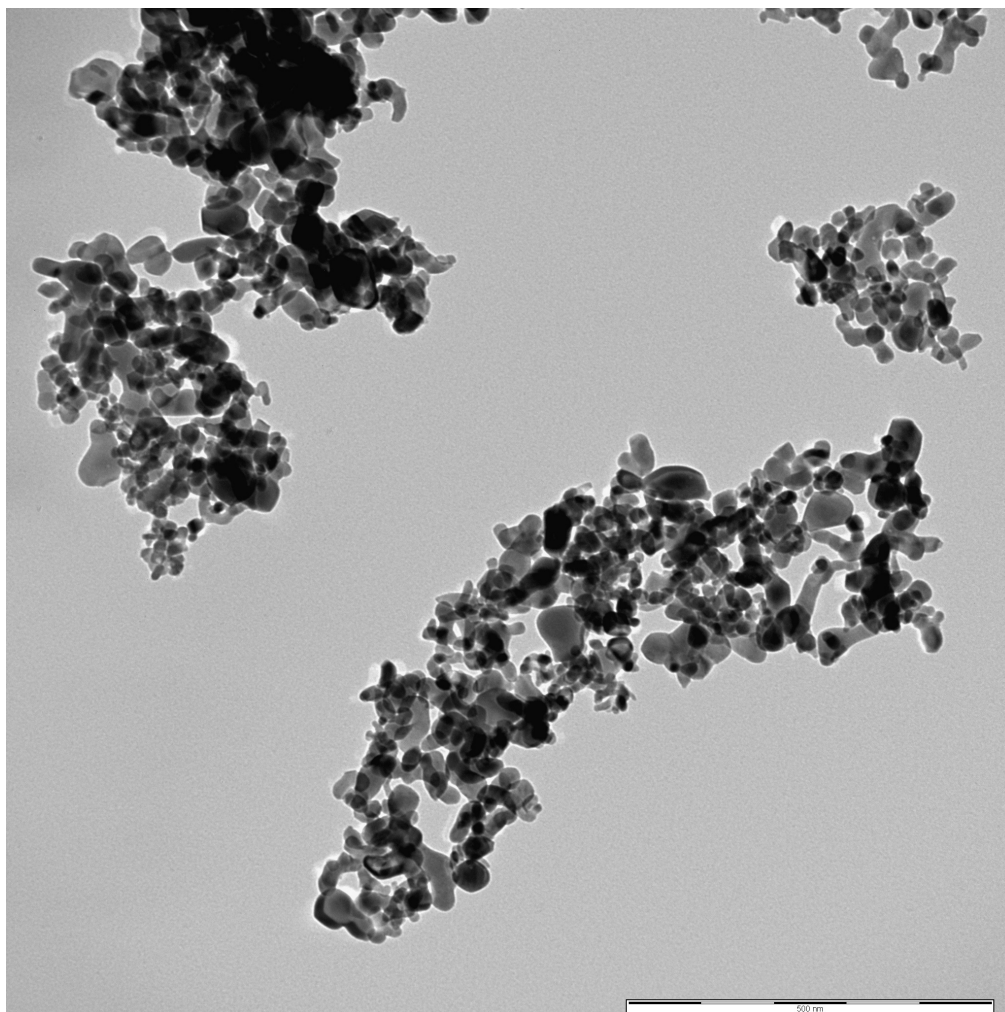

**Fig. S10.** Representative TEM image of Ru/ZrO<sub>2</sub> catalyst.



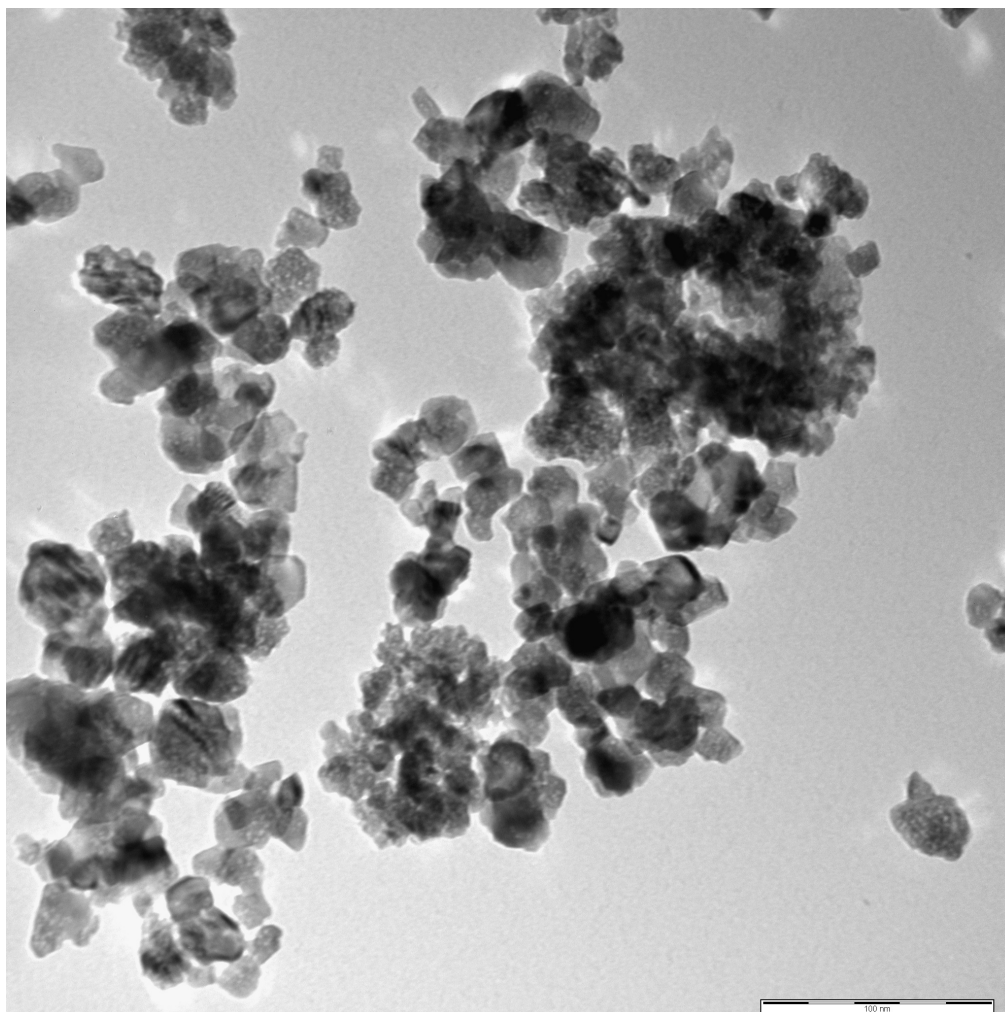

**Fig. S11.** Representative TEM image of Ru/CeO<sub>2</sub> catalyst.

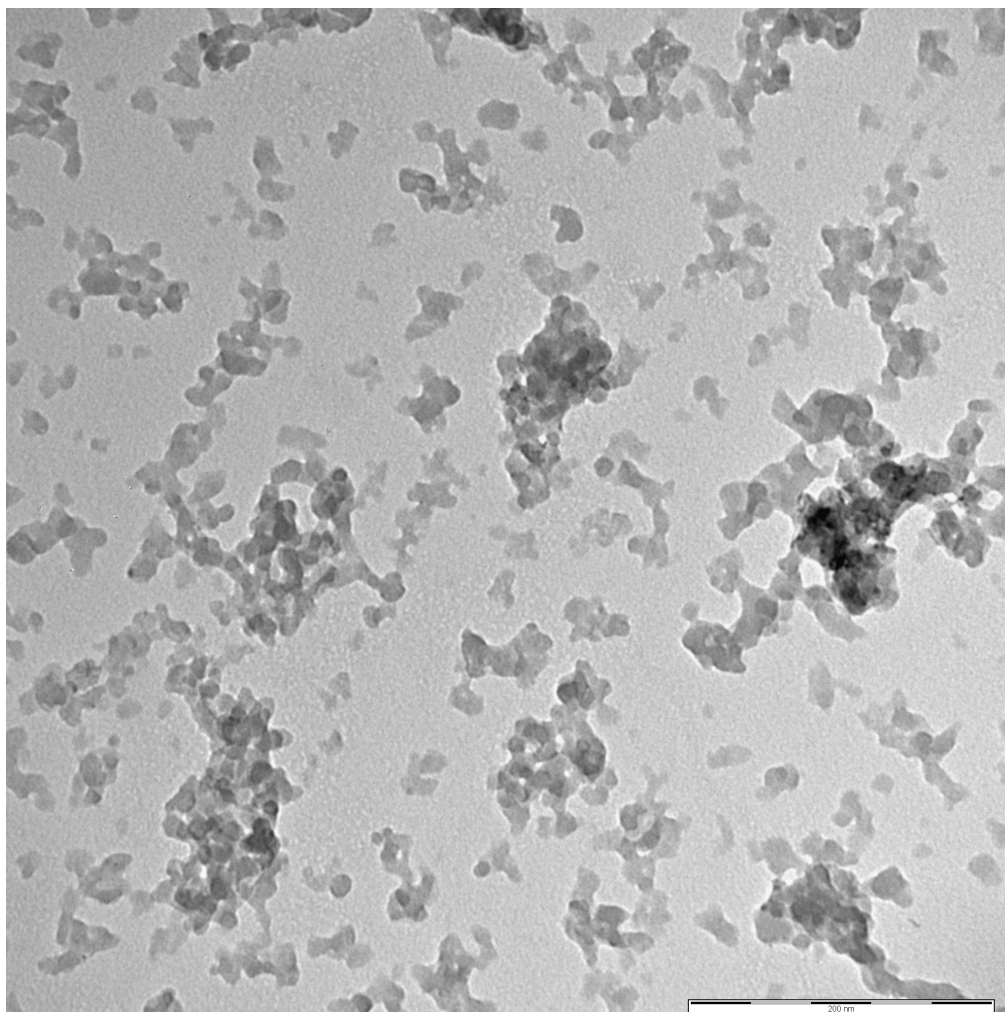

**Fig. S12.** Representative TEM image of Ru/SiO<sub>2</sub> catalyst.

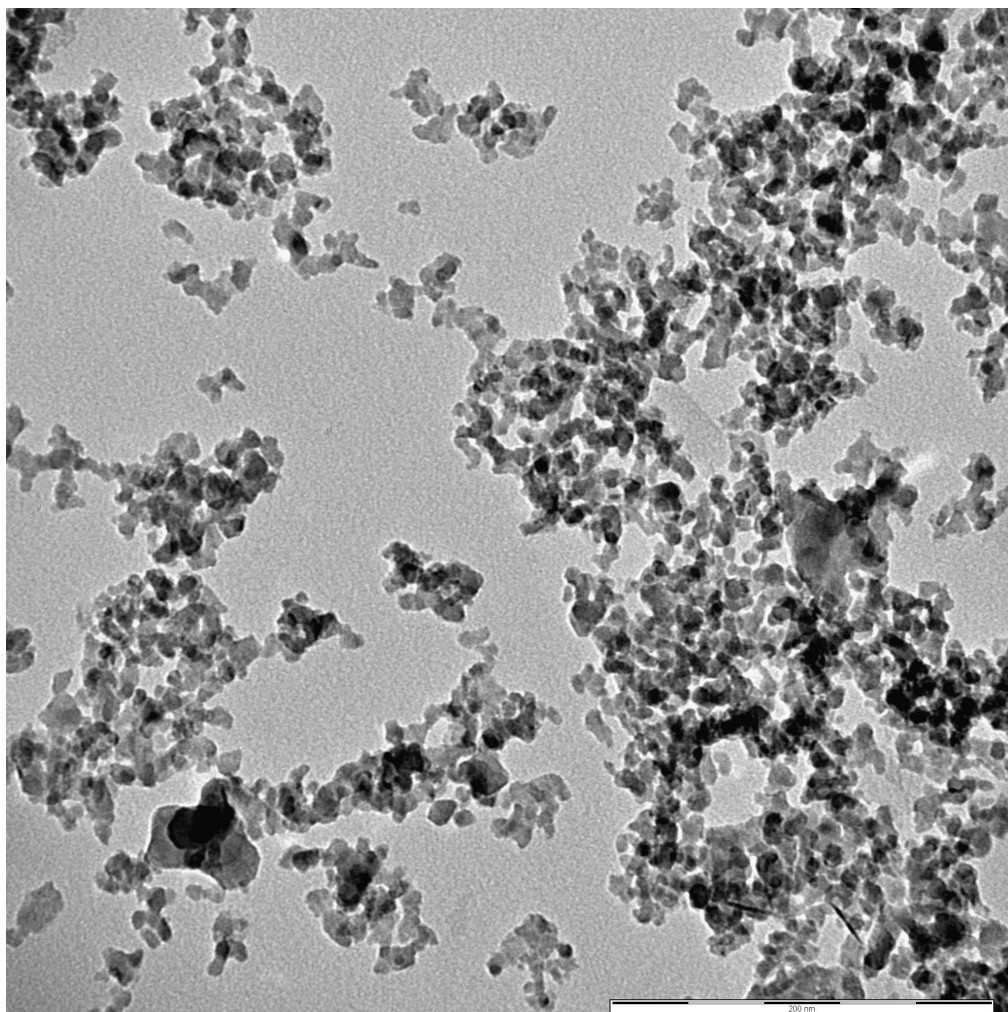

**Fig. S13.** Representative TEM image of Ru/Al<sub>2</sub>O<sub>3</sub> catalyst.

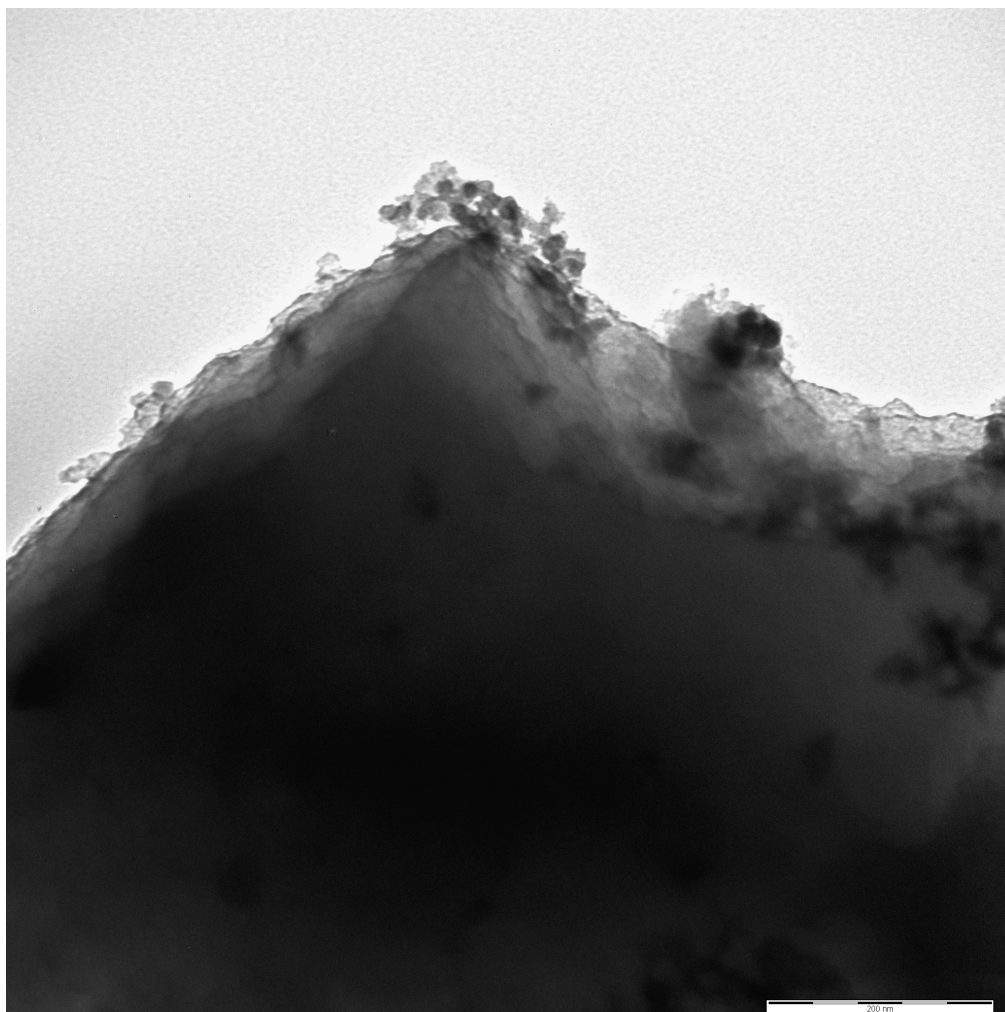

**Fig. S14.** Representative TEM image of Ru/C catalyst.

### **C. XRD Data**

As no significant peaks associated with Ruthenium are detected, all XRD-Signals are normalized according to:

$$Y_{Norm}(x) = \frac{Y(x)}{Y_{max}} \quad (S1)$$

This allows an easy comparison of all materials.

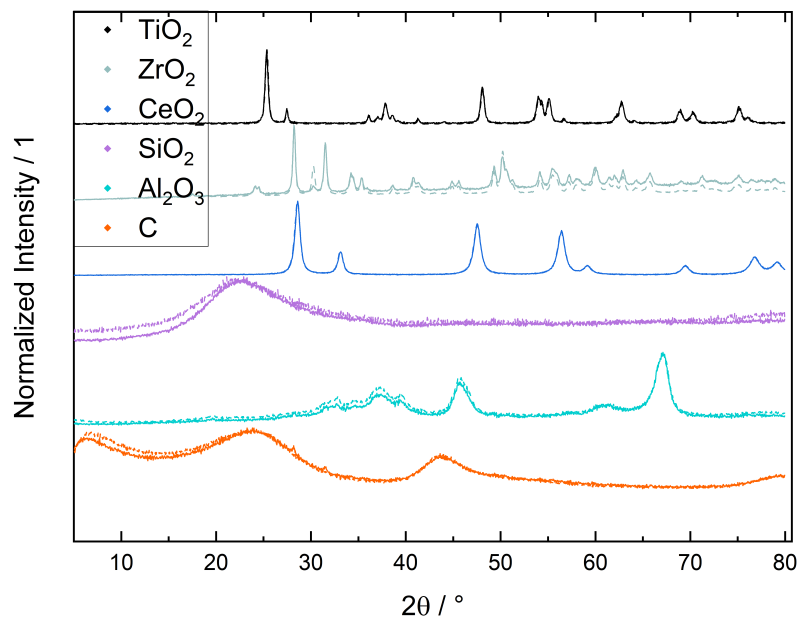

**Fig. S15.** Normalized Intensities of Diffraction of fresh supports (dashed lines) and catalysts (solid lines)

### 3. ADDITIONAL DATA

The following tables show additional data from the screening experiments. The CH<sub>4</sub> selectivity for all catalysts under all operating points is shown in Tab. (S1). The

**Table S1.** Methane selectivity in percent for all catalysts under all operating conditions

| Catalyst                          | B  | C  | D  | E  | F  | G  | H  | I  | J  | K  |
|-----------------------------------|----|----|----|----|----|----|----|----|----|----|
| Ru/TiO <sub>2</sub>               | 97 | 96 | 96 | 97 | 97 | 97 | 97 | 95 | 98 | 98 |
| Ru/ZrO <sub>2</sub>               | 97 | 96 | 96 | 97 | 97 | 97 | 97 | 94 | 98 | 97 |
| Ru/CeO <sub>2</sub>               | 44 | 32 | 37 | 43 | 53 | 42 | 47 | 45 | 57 | 53 |
| Ru/Al <sub>2</sub> O <sub>3</sub> | 97 | 93 | 97 | 98 | 98 | 98 | 96 | 97 | 97 | 96 |
| Ru/SiO <sub>2</sub>               | 99 | 98 | 99 | 99 | 99 | 99 | 99 | 99 | 99 | 99 |
| Ru/C                              | 83 | 87 | 95 | 73 | 67 | 62 | 77 | 54 | 85 | 73 |

selectivity to higher hydrocarbons for all catalysts under all operating points is shown in Tab. (S2). The CO selectivity for all catalysts under all operating points is shown in Tab. (S3). The CO<sub>2</sub> conversion for all catalysts under all operating points is shown in Tab. (S4).

**Table S2.** Selectivity to higher hydrocarbons in percent for all catalysts under all operating conditions

| Catalyst                          | B | C  | D | E | F | G | H | I | J  | K |
|-----------------------------------|---|----|---|---|---|---|---|---|----|---|
| Ru/TiO <sub>2</sub>               | 3 | 4  | 4 | 3 | 3 | 3 | 3 | 5 | 2  | 2 |
| Ru/ZrO <sub>2</sub>               | 3 | 4  | 4 | 3 | 3 | 3 | 3 | 6 | 2  | 3 |
| Ru/CeO <sub>2</sub>               | 6 | 9  | 7 | 5 | 4 | 5 | 8 | 6 | 10 | 9 |
| Ru/Al <sub>2</sub> O <sub>3</sub> | 3 | 7  | 3 | 2 | 2 | 2 | 4 | 3 | 3  | 4 |
| Ru/SiO <sub>2</sub>               | 1 | 2  | 1 | 1 | 1 | 1 | 1 | 1 | 1  | 1 |
| Ru/C                              | 3 | 13 | 5 | 4 | 2 | 4 | 3 | 4 | 4  | 3 |

**Table S3.** CO Selectivity in percent for all catalysts under all operating conditions

| Catalyst                          | B  | C  | D  | E  | F  | G  | H  | I  | J  | K  |
|-----------------------------------|----|----|----|----|----|----|----|----|----|----|
| Ru/TiO <sub>2</sub>               | 0  | 0  | 0  | 0  | 0  | 0  | 0  | 0  | 0  | 0  |
| Ru/ZrO <sub>2</sub>               | 0  | 0  | 0  | 0  | 0  | 0  | 0  | 0  | 0  | 0  |
| Ru/CeO <sub>2</sub>               | 50 | 59 | 56 | 52 | 43 | 53 | 45 | 49 | 33 | 38 |
| Ru/Al <sub>2</sub> O <sub>3</sub> | 0  | 0  | 0  | 0  | 0  | 0  | 0  | 0  | 0  | 0  |
| Ru/SiO <sub>2</sub>               | 0  | 0  | 0  | 0  | 0  | 0  | 0  | 0  | 0  | 0  |
| Ru/C                              | 14 | 0  | 0  | 23 | 31 | 34 | 20 | 42 | 11 | 24 |

**Table S4.** CO<sub>2</sub> conversion in percent for all catalysts under all operating conditions

| Catalyst                          | B    | C    | D    | E    | F     | G    | H    | I    | J     | K     |
|-----------------------------------|------|------|------|------|-------|------|------|------|-------|-------|
| Ru/TiO <sub>2</sub>               | 7.39 | 1.48 | 3.47 | 7.10 | 13.71 | 6.77 | 8.97 | 3.90 | 13.08 | 8.64  |
| Ru/ZrO <sub>2</sub>               | 6.66 | 0.77 | 2.43 | 6.64 | 17.89 | 7.29 | 10.2 | 2.86 | 17.05 | 10.53 |
| Ru/CeO <sub>2</sub>               | 0.32 | 0.05 | 0.12 | 0.30 | 0.73  | 0.29 | 0.35 | 0.17 | 0.48  | 0.33  |
| Ru/Al <sub>2</sub> O <sub>3</sub> | 0.67 | 0.09 | 0.36 | 0.80 | 1.67  | 0.84 | 0.85 | 0.48 | 1.51  | 0.71  |
| Ru/SiO <sub>2</sub>               | 0.3  | 0.05 | 0.16 | 0.44 | 1.13  | 0.53 | 0.73 | 0.36 | 1.10  | 0.78  |
| Ru/C                              | 0.09 | 0.01 | 0.03 | 0.10 | 0.27  | 0.10 | 0.12 | 0.06 | 0.16  | 0.12  |
